# Supplementary material
Source: PubMed Central journal article supplement (PMC7768767)
Supplement: pnas.2013065117.sapp.pdf [file pnas.2013065117.sapp.pdf]

**Supplemental items:**

**Supplemental Methods:**

***Separation of gentamicin lot containing gentamicin C1, C1a, C2, and C2a (Vendor E, Chem Impex Lot #20110415).***

Salt to free base: 1 g of gentamicin sulfate was dissolved in 20 mL of deionized H<sub>2</sub>O. Dowex 550A OH anion exchange resin was added to the clear solution until a ~pH11 was reached (pH paper). The resin was filtered and washed with water, and the aqueous filtrate was concentrated to a foamy white solid.

Solvent preparation: 500 mL of isopropyl alcohol (IPA), 500 mL of 17% NH<sub>4</sub>OH, and 1L of CHCl<sub>3</sub> were sequentially added to a separatory funnel, shaken, and allowed to settle until both layers were clear. The bottom layer was collected and used as the eluent. The upper aqueous layer was discarded.

Chromatographic separation – C1 pure, C2/2a mixture, C1a pure: The free based gentamicin mixture was dissolved in methanol and slurried with an equal weight of flash silica gel, and then the solvent was evaporated to dryness and thoroughly dried under vacuum. The intimate mixture was loaded into a precolumn which was attached to a prepacked column (12 g) of flash silica gel. The column was then eluted with 1:2:1 IPA:CHCl<sub>3</sub>:17% NH<sub>4</sub>OH, at 40 mL/min over 40 min utilizing a Teledyne ISCO combiflash companion system. In total 96 fractions were collected and visualized by iodine stain on TLC. After visualization it was found that C1 and C2/C2a had eluted. The column was flushed with 1:2:1 IPA:CHCl<sub>3</sub>:28% NH<sub>4</sub>OH in order to elute the remaining C1a component of the mixture. The appropriate fractions were collected and reduced under vacuum. Fractions 76-83 contained 107 mg of Gentamicin C1, fractions 86-92 contained 80 mg of C2 and C2a and fractions 6-10 after the solvent swap were combined to give 132 mg of gentamicin C1a. The mixture of gentamicin 2 and 2a were separated by preparative HPLC as illustrated below.

Preparation of sulfate salts: Free based purified gentamicin C-subtypes was dissolved in methanol, and 1M H<sub>2</sub>SO<sub>4</sub> was added dropwise until the pH of the solution reached 3. The solution was allowed to stand for 10 min, and the white precipitate was collected via filtration and washed with methanol. The solid was dried under vacuum.

***Separation of micronomicin lot containing gentamicin C1a and C2b (Vendor B, Alfa Aesar, Lot #N17C046)***

Salt to free base: 5 g of micronomicin sulfate was dissolved in 100 mL of DI H<sub>2</sub>O, and 63.96 g of Dowex 550A OH anion exchange resin was added to the clear solution until a pH of ~11 was reached (pH paper). The resin was filtered off and washed with water, and the aqueous filtrate was concentrated to afford 3.03 g of a foamy white solid.

Solvent preparation: 1 L of IPA, 1 L of 17% NH<sub>4</sub>OH, and 2 L of CHCl<sub>3</sub> were sequentially added to a separatory funnel, shaken, and allowed to settle until both layers were clear. The bottom layer was collected and used as the eluent. The upper aqueous layer was discarded. In the case of the 1:2:1 IPA CHCl<sub>3</sub>: 28% NH<sub>4</sub>OH eluent, the same procedure as above was followed, but using 28% NH<sub>4</sub>OH in place of 17% NH<sub>4</sub>OH.

Chromatographic separation – C2b and C1a pure: The free based micronomicin mixture was dissolved in methanol and slurried with an equal weight of flash silica gel, and then the solvent was evaporated to dryness and thoroughly dried under vacuum. The intimate mixture was loaded into a precolumn which was then attached to a prepacked column (40 g) of flash silica gel. The mixture was then eluted with 1:2:1, IPA:CHCl<sub>3</sub>: 17% NH<sub>4</sub>OH, at 40 mL/min utilizing a Teledyne ISCO combiflash companion system until TLC analysis indicated that the gentamicin C2b had completely eluted. In total, 90 x 20 mL fractions were collected and visualized by iodine stain on TLC. The column was then flushed with 1:2:1, IPA:CHCl<sub>3</sub>: 28% NH<sub>4</sub>OH in order to elute the remaining C1a component of the mixture. In total 120 x 20 mL fractions were collected.

Similar fractions were combined and concentrated under vacuum to provide 1.98 g of C2b and 0.68 g of C1a as white foams.

***Large scale separation of micronomicin – gentamicin C1a and C2b.***

Salt to Free Base: Micronomicin sulfate (25.22 g) was dissolved in 500 mL of water and Dowex 550A resin (325 g) was added and stirred overnight until a pH of ~11 was reached. The resin was filtered, and the volatiles removed to give 17.81 g of a white foam.

Chromatographic separation – C2b and C1a pure: The mixture was dry packed into a silica gel precolumn as described above and a similar procedure to the small scale was followed using a prepacked flash column (330 g) and a flow rate of 100 mL/min. In this way, 10.6 g of the gentamicin C2b free base and 2.5g of the gentamicin C1a free base were recovered.

Sample procedure for the preparation of the sulfate salt: The pure free base gentamicin C-subtypes was dissolved in methanol, and 1M H<sub>2</sub>SO<sub>4</sub> was added dropwise until the pH of the solution reached 3. The solution was allowed to stand for 10 min, and the white precipitate was collected via filtration and washed with methanol. The solid was thoroughly dried under vacuum. Thus 1.98 g of gentamicin C2b free base afforded 2.10 g of C2b sulfate. gentamicin C1a (0.68 g) provided 1.04 g of C1a sulfate as a white powder.

Isolation of gentamicin C2 and C2a from the mixture by preparative HPLC: The mixture of gentamicin C2 and C2a obtained above from the Chem Impex Lot above was separated by multiple injections of 200 mg each (45 injections, 9 grams of mixture in total). The conditions used were as follows: Column: X-Bridge Prep C18, 10µm OBD 50x250mm Buffer A and B: 97% dH<sub>2</sub>O + 3% MeOH +0.2% TFA Gradient: 50% B Isocratic, 60 min, 60 mL/minute flow rate, Loading: 200 mg dissolved in 3.0 mL dH<sub>2</sub>O. Using this method, gentamicin C2 (RT = 11.42 min) and C2a (RT = 14.83 min) were isolated in pure form and converted to the sulfate salt as described in previous examples. The salts were thoroughly dried under vacuum.

**Impurities** The impurities in commercial gentamicin, sisomicin, geneticin, gentamicin A, gentamicin X and gentamicin B, were purchased from commercial sources (Supplemental Table 1). Compounds were further validated and characterized using  $^1\text{H}$  and  $^{13}\text{C}$  NMR spectroscopy performed at the Stanford Core Facility (Supplemental Figure 1 and Table 2). One lot of clinical grade gentamicin was obtained from the Stanford Hospital Pharmacy and prepared for this study by evaporation of the injectable aqueous solution to a dry powder form using a desiccator and stored for an additional 48 hrs in a desiccator charged with silica gel.

**NMR:**  $^1\text{H}$  and  $^{13}\text{C}$  NMR was performed at Stanford University NMR Core Facility.  $^1\text{H}$  NMR data were collected on a Varian Unity Inova 600 MHz spectrometer, operating at 599.78 MHz, equipped with a 5mm Z-axis PFG Triple Resonance HCN Probe, running VNMRJ 4.2 software.  $^{13}\text{C}$  NMR data were collected on a Varian Unity Inova 500 MHz spectrometer, operating at 499.75 MHz for  $^1\text{H}$ , 125.67 MHz for  $^{13}\text{C}$ , equipped with a 5mm Z-axis PFG Switchable X Probe, running VNMRJ 4.2 software. NMR samples were prepared with ~10mg of material in 500  $\mu\text{l}$  of  $\text{D}_2\text{O}$ . All NMR data were collected at 25°C.

$^1\text{H}$  NMR data were acquired with 16 scans of a 45° pulse of 3.1 ms for an acquisition time of 4 seconds and a recycle delay of 1 second. The data were acquired over a spectral width of 9597 Hz (16 ppm) of 76776 complex points with the transmitter offset set at 5.00 ppm. Fourier transformed data were manually phased and a drift correction was applied to flatten the baseline. Spectra were referenced to hydrogen on demand (HOD) resonance at 4.77 ppm at 25°C.

$^{13}\text{C}$  NMR data were acquired with ~200 scans of a 45° pulse of 6.5 ms for an acquisition time of 1.5 seconds and a recycle delay of 1 second with WALTZ-16  $^1\text{H}$  decoupling. The data were acquired over a spectral width of 33003 Hz (263 ppm) of 99010 complex points with the transmitter offset set at 95.6 ppm. Data were zero-filled to 128K points and processed with line-broadening apodization of 2 Hz. Fourier transformed data were manually phased and a drift

correction was applied to flatten the baseline. Spectra were referenced indirectly to 0 ppm for tetramethylsilane (TMS) in CDCl<sub>3</sub>. The <sup>13</sup>C peak assignments shown in Figure S1 were made using previously published datasets (1, 2). Data analysis was performed in VNMR J4.2 software (3).

### **Image Acquisition and analysis:**

Z-stack images for cell counting were captured using a 40x oil objective (1.3NA) on a Zeiss LSM880 or using a 40X oil objective (1.3NA) on a Zeiss LSM700 confocal microscope. Parameters: pinhole 1 airy unit, resolution 512 x 300 (2121.55 x 124.54µm; ~2.5 pixels per µm), 1 µm step size stacks (<40 slices), data from two imaging channels were taken simultaneously. Imaging was automated using a Zeiss macro software tool and the Zen black 2.3 software. To select the region of interest, an image of the entire slide was first acquired using a 20X dry objective (0.5NA) using tile scanning and DAPI fluorescence only, and a mid-apical imaging region was selected for each sample. Hair cells were counted manually and blindly using FIJI opensource software (NIH <https://imagej.nih.gov/>) (4). Outer hair cells were identified using the following criteria: presence of a bundle, presence of F-actin and Myosin VIIa at the cuticular plate, non-pyknotic nucleus, and Myosin VIIa expression throughout the cell body and surrounding the nucleus. For inner hair cells, Myosin VIIa and nuclear staining were the criteria since inner hair cells were only used as a metric of distance. Distance was measured along the tunnel of corti using FIJI; distance was used when the inner hair cells were lost or too damaged to count (4). Data points presented as mean ± SD. For each dataset, each drug was normalized to the hair cell counts for the 30 µM dose (undamaged). All but one data set (G418) was fitted with the following Hill1 function using OriginPro2018 software:

$$y = 1 + (0 - 1) \frac{x^n}{k^n + x^n}$$

Geneticin was fitted with the following bi-phasic sigmoidal dose response function:

$$y = A1 + (A2 - A1) \left( \frac{p}{1 + 10^{(\text{LOG}x_{01} - x)h_1}} + \frac{1-p}{1 + 10^{(\text{LOG}x_{02} - x)h_2}} \right)$$

From the Hill function-fitted data, the EC50 and Hill co-efficient values were extracted. Logx01 is the first EC50, Logx02 is the second EC50, H1 is the first slope, H2 is the second slope, p is the proportion in each dose response and was 0.5, and A1 and A2 are the start and end set as 1 and 0, respectively. Comparisons between fitted data-sets were made using F-Tests.

### **Antimicrobial Testing:**

All tests were performed by the Clinical Microbiology Institute laboratory. Ten bacterial strains were tested from four species - *E. coli*, *S. aureus*, *K. pneumoniae*, and *P. aeruginosa*. For the 40 strains tested, six strains were from the American Type Culture Collection (ATCC, Manassas, VA) and the remaining 32 strains were clinical isolates available from the Clinical Microbiology Institute's collection (Wilsonville, OR). Of the 40 strains, 15 strains were known to have resistance to other antibiotics (e.g., methicillin resistant, ESBL (extended-spectrum beta-lactamases) positive, AmpC beta-lactamase positive, multi-drug resistant, ciprofloxacin resistant and imipenem resistant), and 25 strains were wild-type isolates with no reported antibiotic resistance phenotypes. The minimum inhibitory concentration (MIC) was established for each drug using a microdilution test performed according to the latest Clinical Laboratory Standards Institute (CLSI) document M7-A11, 2018 (31). Briefly, 96 well plates were prepared 1 inoculum for each organism tested, the drug and the medium then added. Inhibition readings were performed after a 24hr growth period (31).

Drugs were prepared as follows, 15 mg of each individual gentamicin component was prepared in a 1 ml Eppendorf tube, and re-suspended in 1ml MilliQ H<sub>2</sub>O. Samples were then desiccated for 24 hrs in a Thermo Savant 120 SpeedVac Concentrator (ThermoScientific) and for 48 hrs in chamber containing Drierite (Sigma-Aldrich). The sample was then transferred to a

15 ml falcon tube, the dry weight recorded. For transport, falcon tubes were sealed with parafilm and transported at room temperature (RT).

For data analysis, the CLSI and Hospital Gentamicin breakpoints for *E. coli*, *S. aureus*, *K. pneumoniae* and *P. aeruginosa* were used (5). The breakpoint of  $\leq 4$   $\mu\text{g/ml}$  for gentamicin is set by CLSI (6). For analysis of potency, geometric means were used to graphically represent the central tendency of the logarithmic categorical data shown in box plot form. For the comparisons between the hospital gentamicin and the individual C-subtypes and impurities, only the strains that were inhibited by hospital gentamicin were compared. Statistical comparisons were performed using a non-parametric Mann-Whitney U-test using OriginPro2018 software (OriginLab, Northampton, MA).

### **Immunohistochemistry:**

Tissues were fixed in 4% paraformaldehyde (PFA) prepared in a 1X phosphate buffered saline (PBS) solution (Electron Microscopy Services, Cat#19342-10) for 30 min at RT. Tissues were then washed with PBS 3 times for 5 min each, then blocked with 5% donkey serum, 0.1% Triton X-100, 1% bovine serum albumin (BSA), (Thermo Fisher Scientific, Cat#9048-46-8), and 0.02%  $\text{NaN}_3$  (Sigma-Aldrich) in PBS at pH 7.4 for 1hr at RT. Myosin VIIa polyclonal antibody (1:500, Proteus Biosciences, Cat#25-6790) in the above blocking solution was added overnight at 4°C (57, 58). The following day, the primary antibody was removed using 3 PBS washes. Tissues were then incubated with 1:400 546nm donkey anti-mouse secondary antibody (Life Technologies, #A10036) and counterstained with 1:600 Alexa Fluor 488 Phalloidin (Life Technologies, Cat#A12379) and 1:10,000 of a 5mg/ml 4',6-Diamidino-2-Phenylindole, Dihydrochloride stock solution (Thermo Fisher Scientific, Cat #D1306) diluted in 0.1% Triton X-100, 0.1% BSA, and 0.02%  $\text{NaN}_3$  solution in PBS at pH 7.4 for 90 min at RT. Immunohistochemistry was performed while the tissue was secured to the minuten pin.

For imaging, the organ of Corti was dissected away from the modiolus as one unit and explanted onto Cell-Tak (Fisher Scientific, Cat#CB40240) coated, 22 mm diameter round glass coverslips (Bioscience Tools, Cat# CS-No1-10), oriented so that the apical surfaces of the hair cells were pointing upwards. Two organ of Corti explants were placed on each coverslip; 10 coverslips per slide. Approximately 15  $\mu$ l of prolong diamond antifade mounting media (Life Technologies, Cat# P36970) was added to each coverslip and an additional coverslip added on top. Samples were stored light protected at RT for 48hrs to allow the medium to dry.

### **Cochlear Cultures:**

Post-natal day five (P5) Sprague Dawley rats (weight range: 13.0-16.5 g; mixed genders; Cat#CrI:SD) from Charles River. Housing conditions and experimental procedures used in this study were in accordance with the Guidelines for the Care and Use of Laboratory Animals of the National Institutes of Health and in accordance with Stanford University Administrative Panel on Laboratory Animal Care (APLAC). Rats were decapitated and the head was then surface sterilized by immersion in 70% ethanol for three 30s periods (7, 8). The head was air dried for 30 seconds, then bisected along the mid-sagittal plane and placed into standard HBSS (Cat #14025076, Thermo Fisher Scientific) containing 1.26mM calcium chloride and 0.5mM magnesium chloride for microdissection. The otic capsule was dissected out from the temporal bone and placed in DMEM/F12 (pH-7) containing L-glutamine and 15 mM HEPES (Cat#D8062, Sigma-Aldrich). The cartilaginous capsule surrounding the cochlea was removed and a stainless-steel minuten pin (0.02 mm tip diameter, 0.2 mm rod diameter, 10 mm length; Cat#26002-20, Fine Science Tools) was placed through the modiolus. The stria vascularis was removed from the apex to the base. The organ of Corti, greater epithelial ridge and spiral ganglion remained as one complete piece. The minuten pin was secured to a custom-made sterile plastic tissue chamber (5-6 mm depth and 9 mm diameter; 200  $\mu$ l volume and was transferred to a 24-well plate containing 1 ml of DMEM/F12 supplemented with 10  $\mu$ M sodium



pyruvate (Cat#11360-070, Thermo Fisher Scientific) and 20  $\mu$ M penicillin G (Cat# P3032, Sigma-Aldrich).

Solutions containing aminoglycosides were stored at  $-80^{\circ}\text{C}$ , thawed and desiccated for 48 hrs in a container with Drierite (Sigma-Aldrich) prior to each experiment (to remove water content). Aminoglycoside powders were re-suspended in a DMEM/F12 solution supplemented with 100  $\mu$ M sodium pyruvate and 30  $\mu$ M Penicillin G. Concentrations ranging from 5 mM to 30  $\mu$ M were prepared by serial dilution. No growth factors were used during the drug treatment period. For Mix 1 and Mix 2, 100 mg/ml solutions were made in Milli-Q water for each individual component. Mixtures containing the following ratios of components were made (Mix 1: C1a = 0.24, C1 = 0.53, C2 = 0.15, C2a = 0.06, C2b = 0.02; Mix 2: C1a = 0.28, C1 = 0, C2 = 0, C2a = 0.07, C2b = 0.65). Mixtures were then desiccated for 24 hrs in a Speedvac concentrator (ThermoScientific) and 48 hrs in a chamber containing Drierite (Sigma-Aldrich).

For treatments, drugs were applied by removing and adding treatment volume above the height of the tissue chamber; three 1 ml volumes were sequentially removed and replaced for a single treatment. Treatments were gently added using a 1 ml syringe and 18G x 1 1/2" needle. Tissues were incubated with drug solution at  $37^{\circ}\text{C}$ , at 5%  $\text{CO}_2$  for 1 hr (Thermo Scientific Steri Cycle 370  $\text{CO}_2$  incubator), after which three 1 ml volumes of DMEM/F12 were sequentially removed and replaced to remove each single drug treatment. A final 1 ml of DMEM/F12 solution supplemented with 100  $\mu$ M sodium pyruvate, 30  $\mu$ M Penicillin G, 20 ng/ml human epidermal growth factor (Sigma-Aldrich Cat# E9644), 10 ng/ml fibroblast growth factor basic (Sigma-Aldrich, Cat#4777), 55 ng/ml insulin-like growth factor (Sigma-Aldrich, Cat#I8779), and 55 ng/ml heparin sulfate proteoglycan (Sigma-Aldrich, Cat#4777), 1x B-27 supplement (Gibco, Cat#17504-044) and 1x N-2 (Gibco, Cat#17502-048) was then added. Tissues were incubated at  $37^{\circ}\text{C}$  and 5%  $\text{CO}_2$  for 46-48 hrs. Cochleae from the same animal were given different drug treatments, cochleae were otherwise randomly distributed.

**Electrophysiology:** Outer hair cells were recorded from postnatal day 7-10 (P7-P10) rats as previously described (9). Briefly, rats were decapitated and the cochlea was removed and placed into external solution containing (in mM): 142 NaCl, 2 KCl, 2 CaCl<sub>2</sub>, 1 MgCl<sub>2</sub>, 10 HEPES (4-(2-hydroxyethyl)-1-piperazineethanesulfonic acid), 6 Glucose, 2 Ascorbate, 2 Pyruvate, 2 Creatine monohydrate, balanced to pH 7.4 with NaOH and a final osmolality of 304 - 310 mOsm. Organ of Corti were further dissected out and a mid-apical region placed into a glass-bottomed recording chamber, held in place with single strands of dental floss. The recording chamber was placed onto the stage for a BX51 fixed stage upright microscope (Olympus) and viewed with a 60x water immersion lens (NA 1.0). The bath was perfused at 2-4 ml/min with a peristaltic pump (Gilson). An apical perfusion pipette was used for drug delivery. The 50-100 μm tipped pipette was placed at a 45-degree angle toward the open face of the sensory hair bundles. Drug selection was through a custom designed and built solenoid switching devices that allowed selection between 7 solutions (37). Solution exchange took less than 2 minutes. Drugs were added to the external solution and serially diluted to desired concentrations. OHCs were accessed by first creating a hole in the epithelium with an external solution filled pipette. Positive pressure allowed for hole formation as well as separation of OHCs from Deiters' cells. Typically, cells from row 1 (closest to Pillar cells) or row 2 were selected for patching. Cells were recorded from using an internal solution containing (in mM): 116 CsCl, 3.5 MgCl<sub>2</sub>, 3.5 ATP, 5 creatine phosphate, 1 Tetra Cesium BAPTA (1,2-bis(*o*-aminophenoxy)ethane-*N,N,N',N'*-tetraacetic acid), 10 HEPES, and 20 ascorbic acid, pH of 7.2 and osmolality of 285 - 290 mOsm.

Whole-cell voltage-clamp was obtained using an axopatch 200b amplifier (Molecular Devices) that was coupled to a computer with the Iotech 3000 DAQ system. JClamp (SCiSoft) controlled data acquisition as well as cell stimulation protocols. Cells were corrected for uncompensated series resistance and junction potential off-line. Cells were discarded if they had more than 50 pA of leak and if mechanotransduction currents were not greater than 800 pA. Dose response curves were obtained for each drug starting from the lowest dose and

incrementing to higher doses after running Standard current-displacement protocols as well as current voltage protocols (see examples in text). Drugs were applied for a minimum of two minutes prior to running stimulus protocols. Drug application was not started until baseline properties had equilibrated, typically 5-10 minutes after establishing the whole-cell mode. Data were analyzed using JClamp software or else exported to Excel or OriginPro2018 (Microcal). Dose response curves were fit with a Hill equation:  $I = I_{max} \frac{x^n}{k^n + x^n}$  where  $x$  is the drug concentration  $k$  is the half blocking dose and  $n$  is the Hill coefficient. For all these fits  $n$  was equal to 1.

**Supplemental Figure 1. Development of a novel purification approach that takes advantage of the variance in gentamicin composition.**

**Supplemental Figure 2. Validation of compounds using  $^{13}\text{C}$  NMR.**

**Supplemental Figure 3. Antimicrobial potency of hospital gentamicin and five C-subtypes.**

**Supplemental Figure 4. Antimicrobial potency of hospital gentamicin and five individual impurities.**

**Supplementary Figure 5. Gentamicin subtypes bind and block the hair cell (MET) mechanotransducer channel.**

**Supplemental Figure 6. Antimicrobial breadth and potency of hospital gentamicin, Mix 1, Mix 2 and C2b.**

**Supplemental Table 1. Details of the individual gentamicin components.**

**Supplemental Table 2. Validation of individual components using  $^1\text{H}$  NMR.**

**Supplementary Table 3. The number of cochleae used for each drug tested.**

**Supplemental Figure Legends**

**Supplemental Figure 1. Development of a novel purification approach that takes advantage of the variance in gentamicin composition.** (A) Gentamicin subtypes are produced by the *Micromonospora* species. The first 3-ringed gentamicin compound in this pathway is gentamicin A, and there are 2 main pathways for gentamicin C-subtypes synthesis that separates at gentamicin X. Gentamicin components studied are highlighted in black boxes. (B) HPLC traces showing relative abundance and order of elution of gentamicin subtypes from five vendors. The subtypes found in gentamicin mixtures vary depending on the *Micromonospora* strain and reaction conditions used. Lots from vendors B and E (pink traces) were used for the purification of the C-subtypes. (C) HPLC traces of purified C-subtypes. Purified gentamicin C-subtypes were additionally validated using NMR (see Fig. S2, Table S2). Co-injection of the lots from vendors B and E confirms the identity of the smallest peak as gentamicin C2b in (D).

**Supplemental Figure 2. Validation of compounds using  $^{13}\text{C}$  NMR.** (A) Gentamicin chemical structure showing the sites of each carbon color coded by ring. (B) The differences between individual gentamicin components occur at 6 different sites, indicated by R groups on Ring I. (C)  $^{13}\text{C}$  spectral data for eight compounds in deuterium oxide. We detected the correct number of carbons for each compound tested, the chemical formulae and number of carbons detected shown at the bottom of the table. Data shows that the differences between compounds induce changes on Ring I structure only, shown in heat map form. Carbon assignments made following data published (1, 2).

**Supplemental Figure 3. Antimicrobial potency of hospital gentamicin and five C-subtypes.** (A) Antimicrobial activity against 15 strains with known resistance to other antibiotics. Black = *S. aureus*, Green = *E.coli*, Blue = *K. pneumoniae*, Brown = *P. aeruginosa*. Each individual strain has a different symbol. (B) Antimicrobial activity against 25 wild-type strains.

**Supplemental Figure 4. Antimicrobial potency of hospital gentamicin and five individual impurities.** (A) Antimicrobial activity of hospital gentamicin, sisomicin, gentamicin A, B, X, and G418 against 15 resistant strains. Black = *S. aureus*, Green = *E.coli*, Blue = *K. pneumoniae*, Brown = *P. aeruginosa*. (B) Antimicrobial activity against 25 wild-type strains.

**Supplementary Figure 5. Gentamicin subtypes bind and block the hair cell mechanotransducer channel.** (A) Summary Voltage (mV) – Current (nA) plots for gentamicin C1a, C2, C2a and C1 where color denotes drug concentration as indicated. (B) Data were derived from the corresponding plot in (A) for each drug. Data shows drug block of MET channel normalized at each voltage. n=8 for each drug.

**Supplemental Figure 6. Antimicrobial breadth and potency of hospital gentamicin, Mix 1, Mix 2 and C2b.** (A) The breadth of hospital gentamicin and Mix 1 are similar (1 strain difference). (B) The potency of hospital and mix 1 are also similar ( $P > 0.05$ , Mann-Whitney U-test) among the different subgroups of *S. aureus* (n=10), *E. coli* (n=10), *K. pneumoniae* (n=10), *P. aeruginosa* (n=10). Included were resistant (15 strains) and non-resistant strains (25 strains). (C) The breadth of Mix 1 and Mix 2 are similar (no strain is different). (D) There is no difference in potency between Mix 1 and Mix 2 among different subgroups. (E) There is one strain difference between Mix 2 and C2b. (F) Mix 2 is more potent than C2b against *S. aureus*, and non-resistant strain groups only ( $P < 0.05$ , Mann-Whitney U-test; n=10, n=25).

1. R. Deubner, C. Schollmayer, F. Wiene, U. Holzgrabe, Assignment of the major and minor components of gentamicin for evaluation of batches. *Magn Reson Chem* **41**, 589-598 (2003).
2. J. B. Morton, R. C. Long, P. J. Daniels, R. W. Tkach, J. H. Goldstein, A carbon-13 magnetic resonance study of aminoglycoside pseudotriaccharides. The gentamicin antibiotics. *Journal of the American Chemical Society* **95**, 7464-7469 (1973).
3. M. O'Reilly *et al.*, Design, synthesis, and biological evaluation of a new series of carvedilol derivatives that protect sensory hair cells from aminoglycoside-induced damage by blocking the mechano-electrical transducer channel. *Journal of medicinal chemistry* **62**, 5312-5329 (2019).
4. J. Schindelin *et al.*, Fiji: an open-source platform for biological-image analysis. *Nat Methods* **9**, 676-682 (2012).
5. Anonymous (Gentamicin Injection, USP. (Federal Drug Administration Web Site.).
6. FDA (2009) National Antimicrobial Resistance Monitoring System - Enteric Bacteria (NARMS): 2005 Executive Report. ed U. S. F. a. D. Administration (U.S. Department of Health and Human Services, Food and Drug Administration, Rockville, MD), p 85.
7. J. F. Krey *et al.*, Mechanotransduction-dependent control of stereocilia dimensions and row identity in inner hair cells. *Current biology : CB* 10.1016/j.cub.2019.11.076 (2019).
8. I. J. Russell, G. P. Richardson, The morphology and physiology of hair cells in organotypic cultures of the mouse cochlea. *Hear Res* **31**, 9-24 (1987).
9. A. W. Peng, R. Gnanasambandam, F. Sachs, A. J. Ricci, Adaptation Independent Modulation of Auditory Hair Cell Mechanotransduction Channel Open Probability Implicates a Role for the Lipid Bilayer. *J Neurosci* **36**, 2945-2956 (2016).

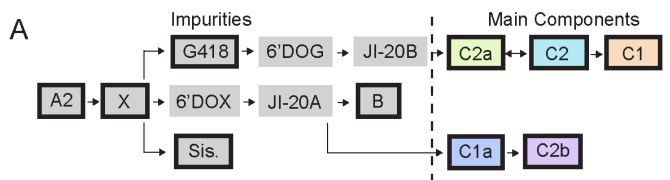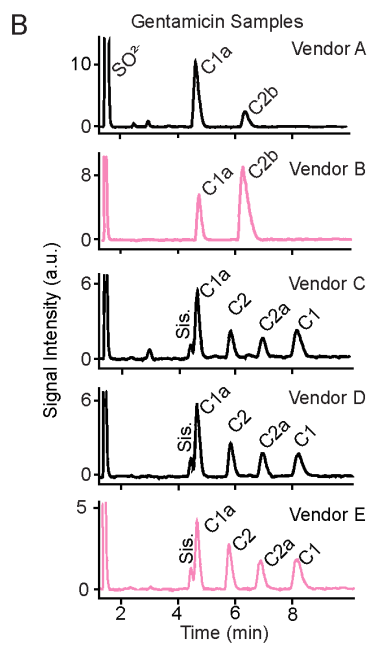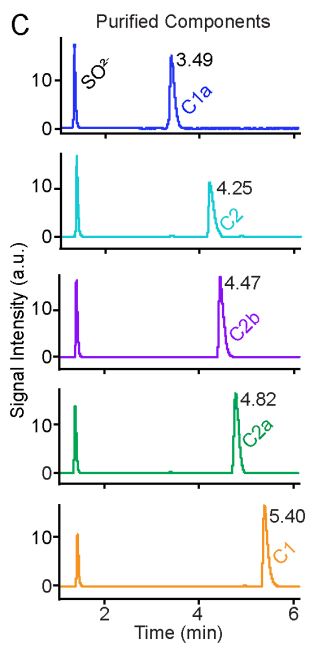

A

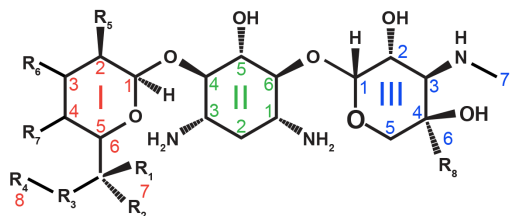

B

|       | R <sub>1</sub>  | R <sub>2</sub>  | R <sub>3</sub>  | R <sub>4</sub>  | R <sub>5</sub>  | R <sub>6</sub> | R <sub>7</sub> | R <sub>8</sub>  |
|-------|-----------------|-----------------|-----------------|-----------------|-----------------|----------------|----------------|-----------------|
| Sis.* | -               | -               | NH <sub>2</sub> | -               | NH <sub>2</sub> | -              | -              | CH <sub>3</sub> |
| C1a   | -               | -               | NH <sub>2</sub> | -               | NH <sub>2</sub> | -              | -              | CH <sub>3</sub> |
| C2    | CH <sub>3</sub> | -               | NH <sub>2</sub> | -               | NH <sub>2</sub> | -              | -              | CH <sub>3</sub> |
| C2a   | -               | CH <sub>3</sub> | NH <sub>2</sub> | -               | NH <sub>2</sub> | -              | -              | CH <sub>3</sub> |
| C2b   | -               | -               | NH              | CH <sub>3</sub> | NH <sub>2</sub> | -              | -              | CH <sub>3</sub> |
| C1    | CH <sub>3</sub> | -               | NH              | CH <sub>3</sub> | NH <sub>2</sub> | -              | -              | CH <sub>3</sub> |
| G418  | -               | CH <sub>3</sub> | OH              | -               | NH <sub>2</sub> | OH             | OH             | CH <sub>3</sub> |
| A     | -               | -               | OH              | -               | NH <sub>2</sub> | OH             | OH             | -               |
| B     | -               | -               | NH <sub>2</sub> | -               | OH              | OH             | OH             | CH <sub>3</sub> |

\* Double bond between atom C4' and C5'

C

| Site             | Ring | Sisomicin                                                     | C1a                                                           | C2                                                            | C2a                                                           | C2b                                                           | C1                                                            | G418                                                           | B                                                              | A                                                              |
|------------------|------|---------------------------------------------------------------|---------------------------------------------------------------|---------------------------------------------------------------|---------------------------------------------------------------|---------------------------------------------------------------|---------------------------------------------------------------|----------------------------------------------------------------|----------------------------------------------------------------|----------------------------------------------------------------|
| 1                | III  | 97.22                                                         | 94.311                                                        | 94.739                                                        | 94.042                                                        | 94.082                                                        | 94.571                                                        | 97.441                                                         | 95.906                                                         | 96.8                                                           |
| 2                | III  | 66.306                                                        | 66.246                                                        | 66.238                                                        | 66.246                                                        | 66.25                                                         | 66.246                                                        | 66.206                                                         | 66.29                                                          | 66.25                                                          |
| 3                | III  | 63.401                                                        | 63.293                                                        | 63.285                                                        | 63.289                                                        | 63.289                                                        | 63.289                                                        | 63.341                                                         | 63.365                                                         | 63.44                                                          |
| 4                | III  | 69.917                                                        | 69.885                                                        | 69.881                                                        | 69.889                                                        | 69.885                                                        | 69.885                                                        | 69.881                                                         | 69.85                                                          | 69.4                                                           |
| 5                | III  | 67.621                                                        | 67.785                                                        | 67.793                                                        | 67.797                                                        | 67.789                                                        | 67.793                                                        | 67.713                                                         | 67.693                                                         | 68.97                                                          |
| 6                | III  | 20.869                                                        | 20.877                                                        | 20.873                                                        | 20.881                                                        | 20.877                                                        | 20.877                                                        | 20.879                                                         | 20.837                                                         |                                                                |
| 7                | III  | 34.483                                                        | 34.459                                                        | 34.463                                                        | 34.459                                                        | 34.451                                                        | 34.459                                                        | 34.487                                                         | 34.411                                                         | 29.51                                                          |
| 1                | II   | 49.96                                                         | 49.723                                                        | 49.687                                                        | 49.723                                                        | 49.731                                                        | 49.711                                                        | 49.527                                                         | 49.755                                                         | 49.53                                                          |
| 2                | II   | 27.378                                                        | 27.626                                                        | 27.626                                                        | 27.197                                                        | 27.606                                                        | 27.622                                                        | 28.027                                                         | 27.522                                                         | 27.83                                                          |
| 3                | II   | 48.132                                                        | 48.541                                                        | 48.581                                                        | 48.641                                                        | 48.557                                                        | 48.573                                                        | 48.91                                                          | 47.551                                                         | 48.71                                                          |
| 4 or 6           | II   | 83.058                                                        | 83.547                                                        | 83.583                                                        | 83.547                                                        | 83.555                                                        | 83.587                                                        | 83.302                                                         | 83.863                                                         | 83.49                                                          |
| 5                | II   | 73.592                                                        | 74.434                                                        | 74.421                                                        | 74.55                                                         | 74.466                                                        | 74.438                                                        | 73.572                                                         | 72.322                                                         | 73.64                                                          |
| 4 or 6           | II   | 79.018                                                        | 76.02                                                         | 76.165                                                        | 75.588                                                        | 75.7                                                          | 75.932                                                        | 75.203                                                         | 79.755                                                         | 73.78                                                          |
| 1                | I    | 101.168                                                       | 101.159                                                       | 101.155                                                       | 101.176                                                       | 101.176                                                       | 101.168                                                       | 100.951                                                        | 101.232                                                        | 100.61                                                         |
| 2                | I    | 46.044                                                        | 48.617                                                        | 48.749                                                        | 48.641                                                        | 48.557                                                        | 48.685                                                        | 54.136                                                         | 70.691                                                         | 60.64                                                          |
| 3                | I    | 23.639                                                        | 25.47                                                         | 22.889                                                        | 25.197                                                        | 25.546                                                        | 23.086                                                        | 70.125                                                         | 70.691                                                         | 60.36                                                          |
| 4                | I    | 100.338                                                       | 20.437                                                        | 20.545                                                        | 20.212                                                        | 20.38                                                         | 20.549                                                        | 81.687                                                         | 72.125                                                         | 80.13                                                          |
| 5                | I    | 143.607                                                       | 65.998                                                        | 68.767                                                        | 70.093                                                        | 65.657                                                        | 69.136                                                        | 69.444                                                         | 68.707                                                         | 62.37                                                          |
| 6                | I    | 40.57                                                         | 42.626                                                        | 49.483                                                        | 51.082                                                        | 52.184                                                        | 57.458                                                        | 65.244                                                         | 40.222                                                         | 53.97                                                          |
| 7                | I    |                                                               |                                                               | 12.241                                                        | 14.105                                                        |                                                               | 9.287                                                         | 14.381                                                         |                                                                |                                                                |
| 8                | I    |                                                               |                                                               |                                                               |                                                               | 33.453                                                        | 31.064                                                        |                                                                |                                                                |                                                                |
| Chemical Formula |      | C <sub>19</sub> H <sub>37</sub> N <sub>5</sub> O <sub>7</sub> | C <sub>19</sub> H <sub>39</sub> N <sub>5</sub> O <sub>7</sub> | C <sub>20</sub> H <sub>41</sub> N <sub>5</sub> O <sub>7</sub> | C <sub>20</sub> H <sub>41</sub> N <sub>5</sub> O <sub>7</sub> | C <sub>20</sub> H <sub>41</sub> N <sub>5</sub> O <sub>7</sub> | C <sub>21</sub> H <sub>43</sub> N <sub>5</sub> O <sub>7</sub> | C <sub>20</sub> H <sub>40</sub> N <sub>4</sub> O <sub>10</sub> | C <sub>19</sub> H <sub>38</sub> N <sub>4</sub> O <sub>10</sub> | C <sub>18</sub> H <sub>36</sub> N <sub>4</sub> O <sub>10</sub> |
| No of Carbons:   |      | 19                                                            | 19                                                            | 20                                                            | 20                                                            | 20                                                            | 21                                                            | 20                                                             | 19                                                             | 18                                                             |



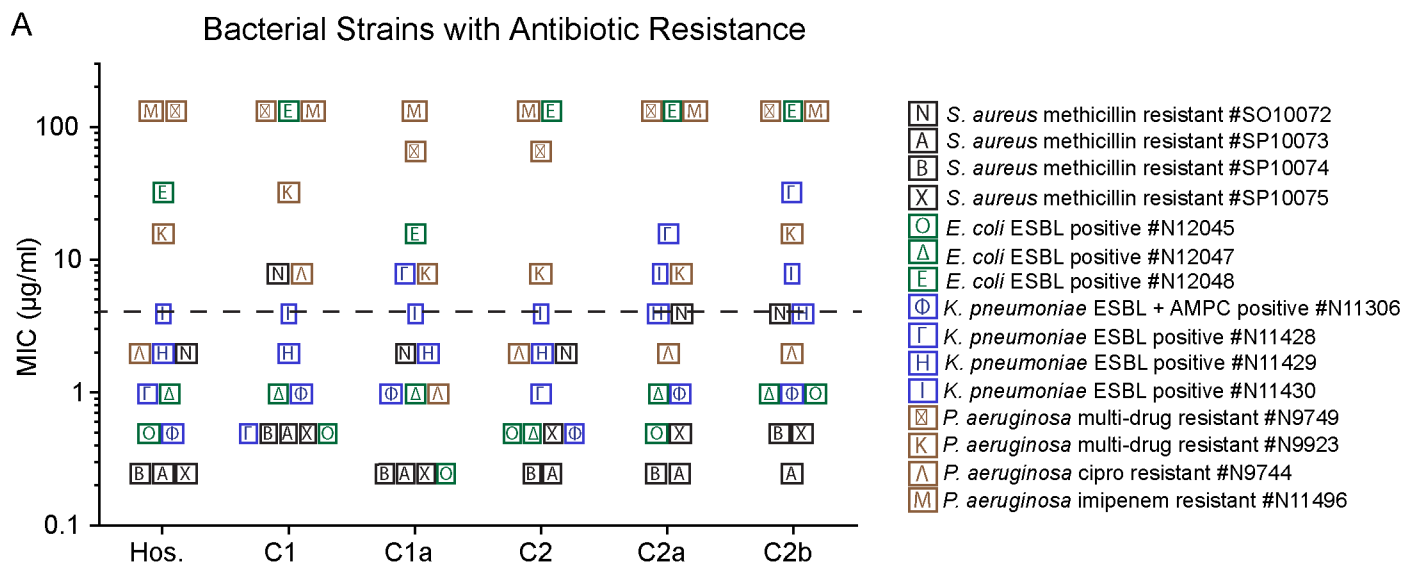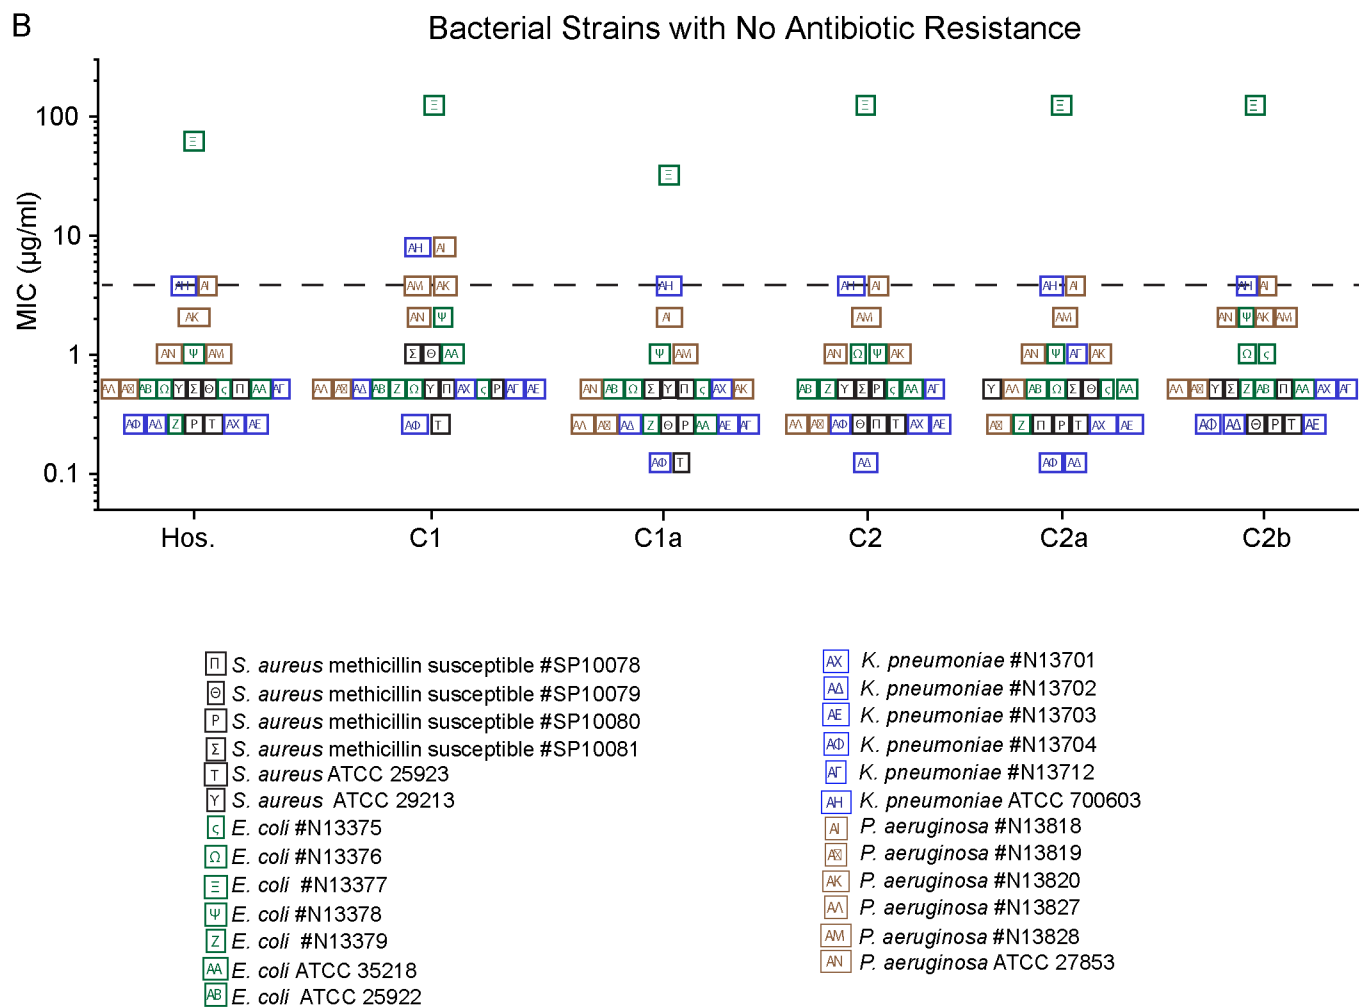

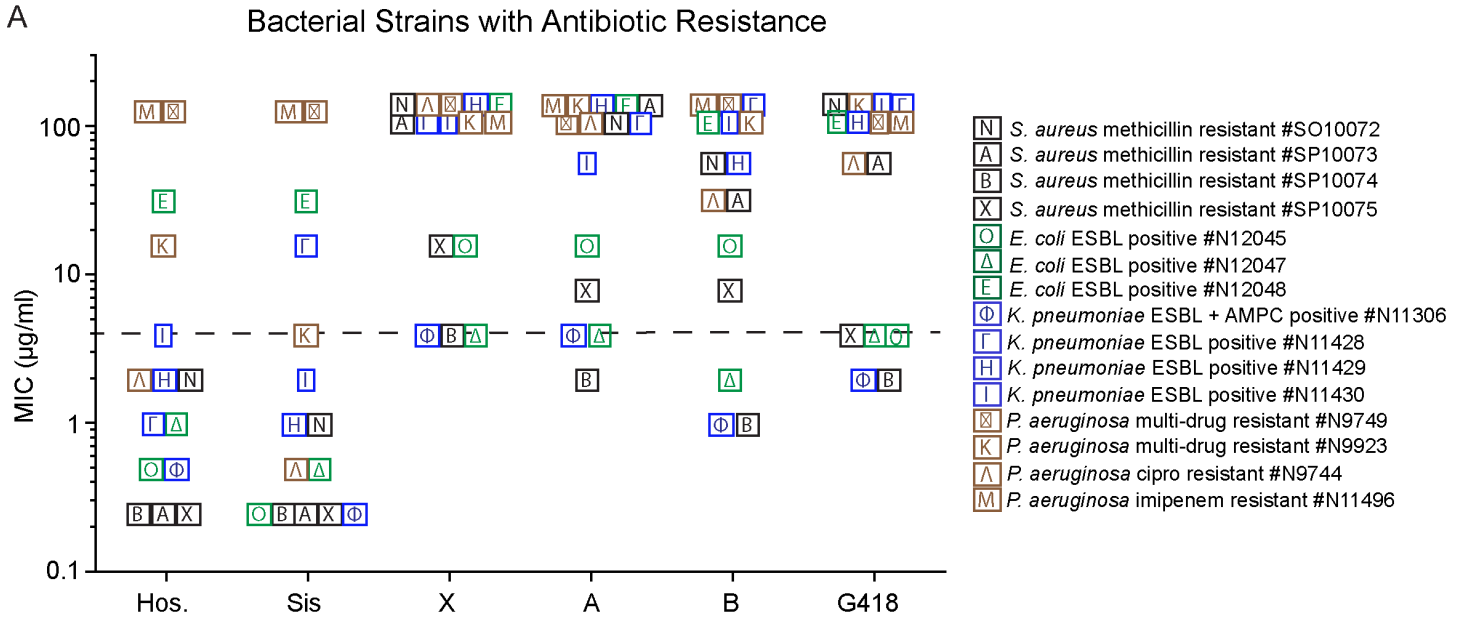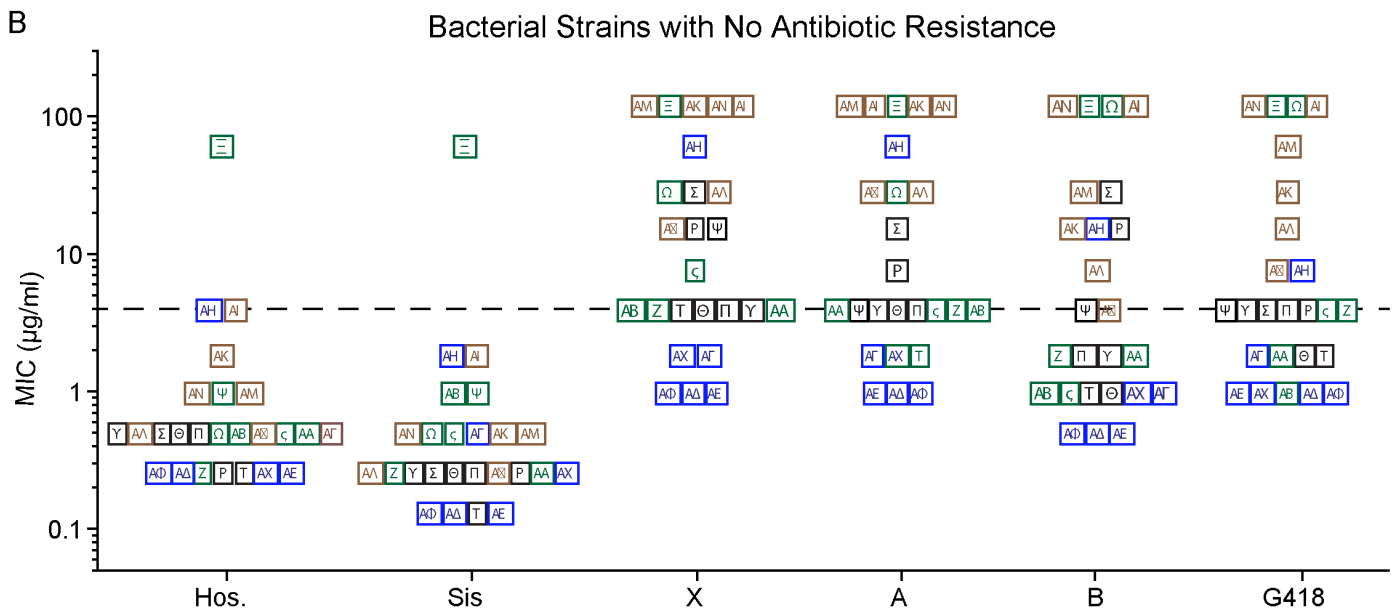

- Π *S. aureus* methicillin susceptible #SP10078
- Θ *S. aureus* methicillin susceptible #SP10079
- P *S. aureus* methicillin susceptible #SP10080
- Σ *S. aureus* methicillin susceptible #SP10081
- T *S. aureus* ATCC 25923
- Y *S. aureus* ATCC 29213
- ς *E. coli* #N13375
- Ω *E. coli* #N13376
- Ξ *E. coli* #N13377
- Ψ *E. coli* #N13378
- Z *E. coli* #N13379
- AA *E. coli* ATCC 35218
- AB *E. coli* ATCC 25922

- AX *K. pneumoniae* #N13701
- AD *K. pneumoniae* #N13702
- AE *K. pneumoniae* #N13703
- AD *K. pneumoniae* #N13704
- AF *K. pneumoniae* #N13712
- AH *K. pneumoniae* ATCC 700603
- AI *P. aeruginosa* #N13818
- AS *P. aeruginosa* #N13819
- AK *P. aeruginosa* #N13820
- AA *P. aeruginosa* #N13827
- AM *P. aeruginosa* #N13828
- AN *P. aeruginosa* ATCC 27853

A

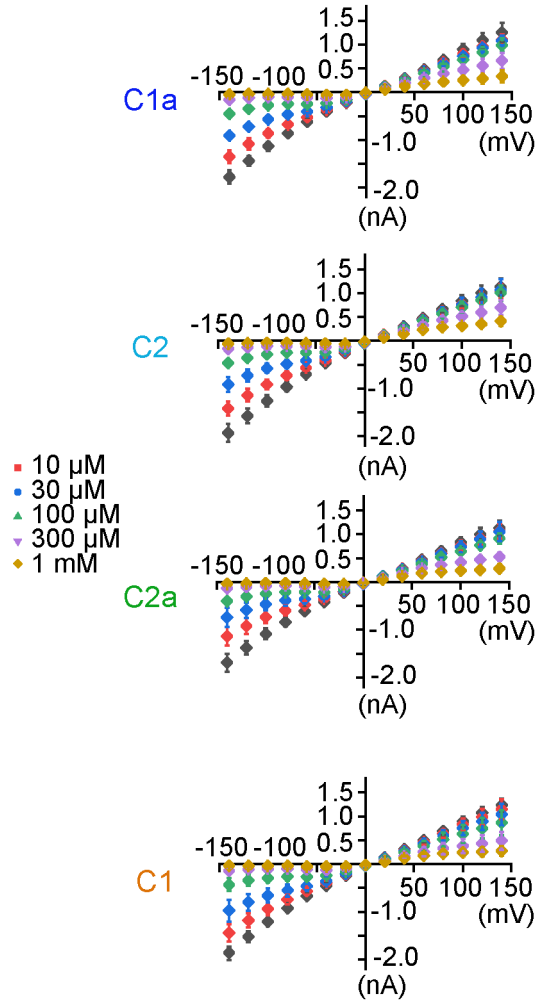

B

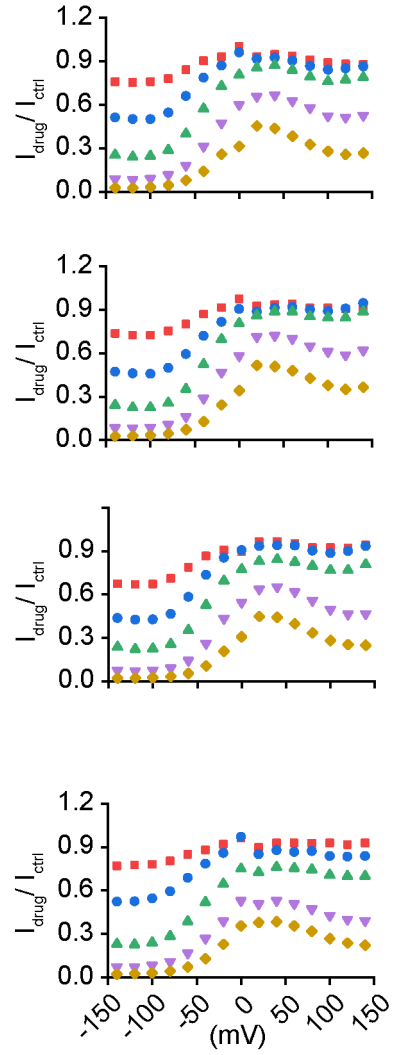

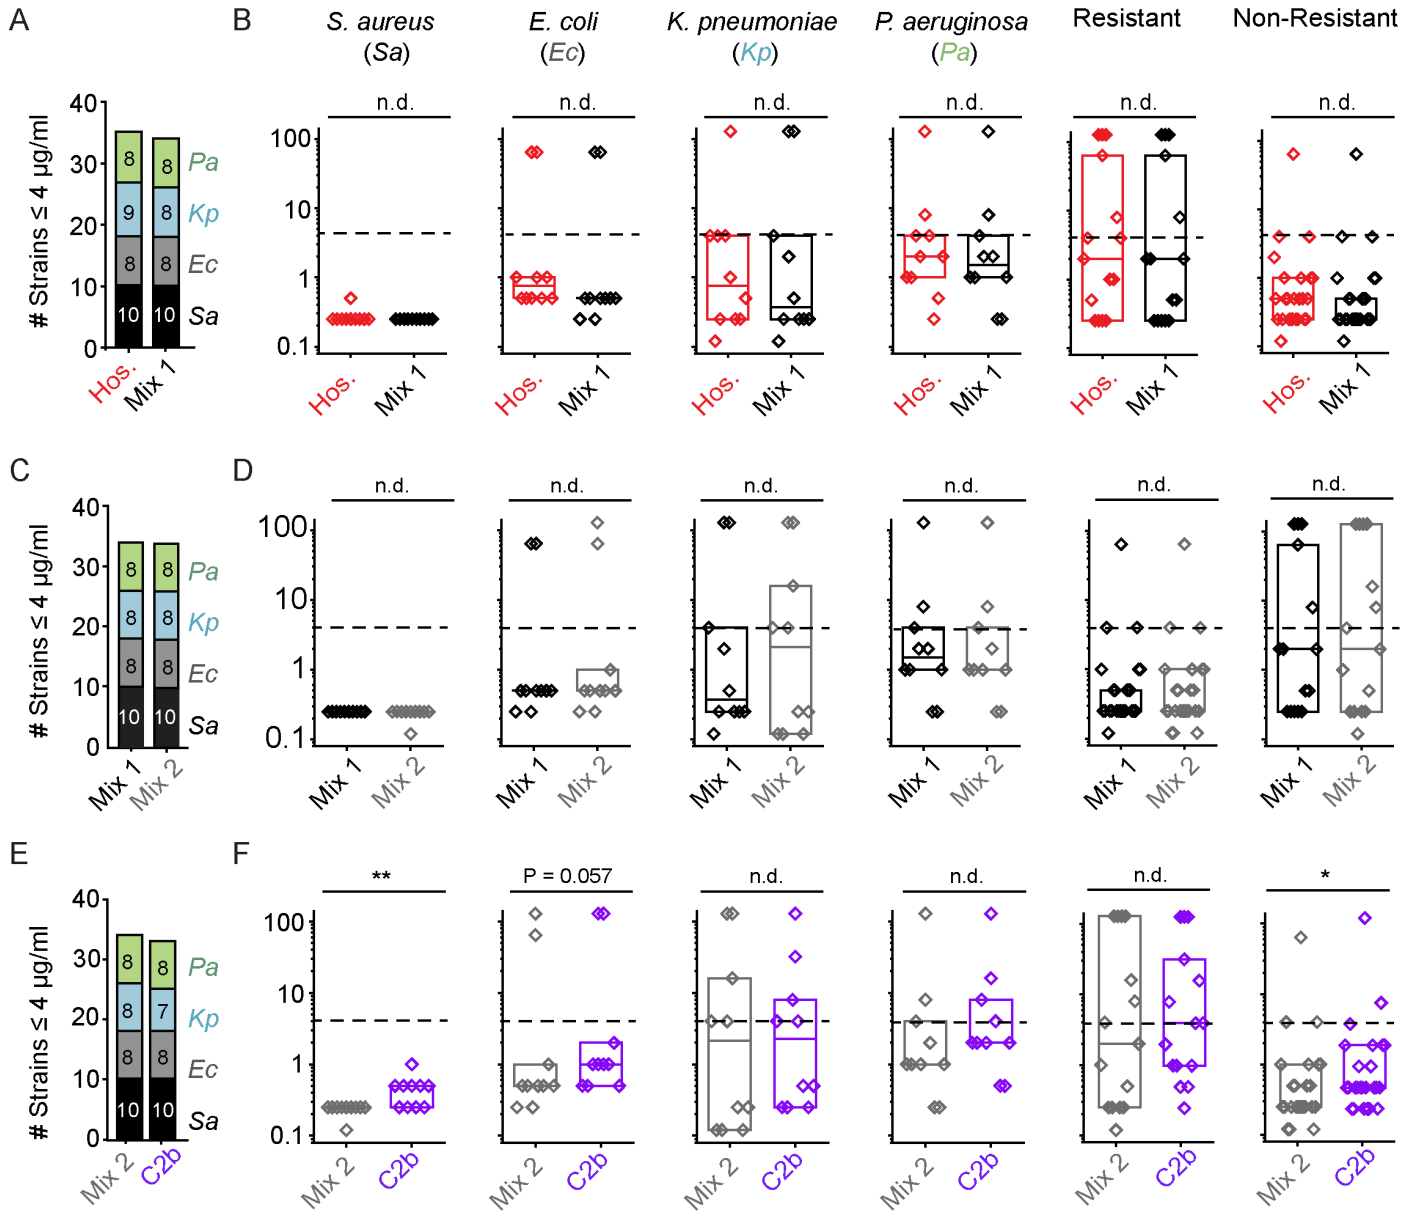

**Supplemental Table 1** Details of the individual gentamicin components.

| <b>Reagent or Resource</b> | <b>Source</b>              | <b>Product #</b> | <b>Vendor Purity</b> | <b>Vendor Method</b>    | <b>NMR Performed By</b>   |
|----------------------------|----------------------------|------------------|----------------------|-------------------------|---------------------------|
| <b><i>Antibiotic</i></b>   |                            |                  |                      |                         |                           |
| Gentamicin C1 Sulfate      | Nanosyn Inc                | NSN22861         | 99.90%               | ELSD                    | Nanosyn + Stanford        |
| Gentamicin C1a Sulfate     | Nanosyn Inc                | NSN22860         | 99.90%               | ELSD                    | Nanosyn + Stanford        |
| Gentamicin C2 Sulfate      | Nanosyn Inc                | NSN22863         | 97.50%               | ELSD                    | Nanosyn + Stanford        |
| Gentamicin C2a Sulfate     | Nanosyn Inc                | NSN22862         | 98.70%               | ELSD                    | Nanosyn + Stanford        |
| Gentamicin C2b Sulfate     | Nanosyn Inc                | NSN22864         | 99.40%               | ELSD                    | Nanosyn + Stanford        |
| Sisomicin Sulfate          | Xian Health China          | Batch HB20160505 | 99%                  | n/a                     | Nanosyn + Stanford        |
| Gentamicin B Acetate       | MicroCombiChem             | MCC3477          | 98%                  | ELSD/MS                 | MicroCombiChem + Stanford |
| Geneticin Sulfate          | Toronto Research Chemicals | G360580          | 96%                  | <sup>1</sup> H NMR + MS | TRC + Stanford            |
| Gentamicin A Sulfate       | Toku-E                     | G035             | 99.20%               | <sup>1</sup> H NMR + MS | Toku-E + Stanford         |
| Gentamicin X Sulfate       | Toku-E                     | G036             | 99.20%               | <sup>1</sup> H NMR + MS | Toku-E                    |

**Supplemental Table 2. Validation of individual components using <sup>1</sup>H NMR.**

| Sisomicin          |     |   |           | Gentamicin C1a |   |   |      | Gentamicin C2 |      |   |           | Gentamicin C2a |      |   |           | Gentamicin C2b |      |   |           | Gentamicin C1 |   |   |      |
|--------------------|-----|---|-----------|----------------|---|---|------|---------------|------|---|-----------|----------------|------|---|-----------|----------------|------|---|-----------|---------------|---|---|------|
| P                  | M   | H | J         | P              | M | H | J    | P             | M    | H | J         | P              | M    | H | J         | P              | M    | H | J         | P             | M | H | J    |
| 5.62               | d   | 1 | 1.3       | 5.87           | s | 1 |      | 5.89          | d    | 1 | 3.6       | 5.95           | d    | 1 | 3.56      | 5.9            | d    | 1 | 3.38      | 5.93          | s | 1 |      |
| 5.2                | t   | 1 | 3.8       | 5.13           | s | 1 |      | 5.13          | d    | 1 | 3.9       | 5.14           | d    | 1 | 3.8       | 5.13           | d    | 1 | 3.7       | 5.14          | s | 1 |      |
| 5.14               | d   | 1 | 3.8       | 4.22           | d | 1 | 11.4 | 4.22          | d,d  | 1 | 11.0, 3.6 | 4.23           | d, d | 1 | 11.0, 3.8 | 4.23           | d, d | 1 | 10.9, 3.8 | 4.23          | d | 1 | 10.8 |
| 4.22               | dd  | 1 | 10.8, 3.8 | 4.14           | t | 1 | 8.6  | 4.09          | d, t | 1 | 12.2, 2.6 | 4.11           | t    | 1 | 9.5       | 4.18           | t, t | 1 | 10.0, 2.6 | 4.16          | d | 1 | 12.2 |
| 4.14               | t   | 1 | 9.8       | 4.08           | t | 1 | 8.9  | 4.03**        | m    | 2 |           | 4.02           | d    | 1 | 12.9      | 4.11           | t    | 1 | 9.6       | 4.07          | t | 1 | 9.2  |
| 4                  | d   | 1 | 12.8      | 4.01           | d | 1 | 12.5 | 4.01          | d    |   | 12.4      | 3.88           | t    | 1 | 9.3       | 4.02           | d    | 1 | 12.8      | 4.02          | d | 1 | 13.1 |
| 3.95               | m   | 1 |           | 3.84           | m | 2 | 7.4  | 3.84          | d    | 2 |           | 3.86           | d    | 1 | 7.5       | 3.8            | q    | 2 | 6.9       | 3.86          | m | 2 |      |
| 3.87               | t   | 1 | 9.9       | 3.56           | m | 3 |      | 3.52-3.64     | m    | 4 |           | 3.85           | m    | 1 |           | 3.62-3.55      | m    | 2 |           | 3.57          | m | 1 |      |
| 3.79               | t   | 1 | 9.5       | 3.5            | s | 1 |      | 3.5           | s    | 1 |           | 3.52-3.64      | m    | 3 |           | 3.55           | t    | 1 | 4.4       | 3.51          | s | 3 |      |
| 3.72               | t   | 1 | 14.2      | 3.48           | s | 1 |      | 3.48          | d    | 1 | 1.9       | 3.52           | d    | 1 | 2.4       | 3.51           | d    | 1 | 2.8       | 3.5           | s | 3 |      |
| 3.68               | d   | 1 | 14.2      | 3.33*          | s |   |      | 3.33*         | s    |   |           | 3.5            | d    | 1 | 4.4       | 3.49           | d    | 1 | 4.6       | 3.45          | m | 1 |      |
| 3.58               | m   | 1 |           | 3.24           | d | 1 | 12.6 | 2.92          | s    | 3 |           | 3.35*          | q    | 1 | 7.5       | 3.25           | d,d  | 1 | 13.1, 2.8 | 3.34          | s | 1 |      |
| 3.54               | m   | 1 |           | 3.07           | t | 1 | 10.8 | 2.55          | d,t  | 1 | 12.5, 4.3 | 2.93           | s    | 3 |           | 3.34           |      |   |           | 2.93          | s | 3 |      |
| 3.5                | d   | 1 | 10.7      | 2.91           | s | 3 |      | 2.08          | q    | 1 | 12.7      | 2.55           | d,t  | 1 | 12.5, 4.2 | 3.12           | d,d  | 1 | 13.2, 9.1 | 2.75          | s | 3 |      |
| 3.49               | d   | 1 | 12.6      | 2.54           | d | 1 | 13.3 | 2.04          | m    | 1 |           | 2.15           | q    | 1 | 12.8      | 2.92           | s    | 3 |           | 2.56          | d | 1 | 12.5 |
| 2.93               | s   | 3 |           | 2.09           | q | 1 | 12.4 | 2.02          | m    | 1 |           | 2.03           | m    | 3 |           | 2.76           | s    | 3 |           | 2.1           | q | 1 | 13   |
| 2.73               | d   | 1 | 19.2      | 2.03           | d | 1 | 16.3 | 1.89          | d    | 1 | 13.6      | 1.53           | m    | 1 |           | 2.55           | d, t | 1 | 12.7, 4.6 | 2.05          | s | 1 |      |
| 2.57               | d,t | 1 | 12.4, 4.0 | 2.01           | s | 1 |      | 1.6           | m    | 1 |           | 1.35           | s    | 3 |           | 2.13           | q    | 1 | 12.5      | 2.04          | s | 1 |      |
| 2.39               | d   | 1 | 19.2      | 1.93           | d | 1 | 14   | 1.34          | s    | 3 |           | 1.32           | d    | 3 | 6.8       | 2.06           | q,d  | 1 | 12.3, 3.8 | 1.91          | d | 1 | 13.1 |
| 2.11               | q   | 1 | 12.3      | 1.57           | q | 1 | 11.7 | 1.28          | d    | 3 | 6.6       |                |      |   |           | 2.01           | m    | 1 | 4.1       | 1.62          | m | 1 |      |
| 1.35               | s   | 3 |           | 1.34           | s | 3 |      |               |      |   |           |                |      |   |           | 1.94           | d,q  | 1 | 13.9, 3.2 | 1.35          | s | 3 |      |
|                    |     |   |           |                |   |   |      |               |      |   |           |                |      |   |           | 1.56           | q, d | 1 | 12.6, 4.2 | 1.3           | d | 1 | 6.75 |
|                    |     |   |           |                |   |   |      |               |      |   |           |                |      |   |           | 1.35           | s    | 3 |           |               |   |   |      |
| Hydrogen Count: 25 |     |   |           | 27             |   |   |      | 29            |      |   |           | 29             |      |   |           | 30             |      |   |           | 33            |   |   |      |

<sup>1</sup>H spectral data for seven components, including peak, multiplicity, hydrogen count and the coupling constant (J) show in hertz.

-P = peak, M = multiplicity, H = hydrogen count, J = coupling constant. The asterisk (\*) at 3.33-3.35 in C1a, C2, and C2a indicates an additional peak integrating to 0.6 and the double asterisk (\*\*) at 4.03 in C2 indicates an additional peak integrating to 0.6.
